# Supplementary material
Source: publisher site journal article supplement (https://www.dovepress.com/get_supplementary_file.php?f=472550.xlsx)
Supplement: Supplementary file 1 [file get_supplementary_file.php]

## Sheet: Sheet1
			men					women
			Mean Difference	Std. Error	P	95% Confidence Interval		Mean Difference	Std. Error	P	95% Confidence Interval
						Lower Bound	Upper Bound				Lower Bound	Upper Bound
fT3(pmol/L)	1	2	-0.207	0.057	< 0.001	-0.319	-0.095	-0.0749876	0.0644216	0.244984	-0.201564	0.0515884
		3	-0.266	0.097	0.006	-0.456	-0.076	-0.00958468	0.0912675	0.916405	-0.188908	0.169738
	2	3	-0.06	0.099	0.547	-0.254	0.134	0.065403	0.095261	0.49268	-0.121766	0.252572
TFQIFT4	1	2	-0.018	0.021	0.408	-0.06	0.024	-0.038	0.036	0.29	-0.109	0.033
		3	-0.106	0.036	0.004	-0.178	-0.034	-0.046	0.051	0.368	-0.146	0.054
	2	3	-0.088	0.037	0.018	-0.161	-0.015	-0.008	0.053	0.883	-0.113	0.097
TFQIFT3	1	2	-0.121	0.029	< 0.001	-0.178	-0.063	-0.078	0.036	0.032	-0.149	-0.007
		3	-0.194	0.05	< 0.001	-0.292	-0.097	-0.097	0.052	0.061	-0.198	0.005
	2	3	-0.074	0.051	0.146	-0.173	0.026	-0.019	0.054	0.73	-0.124	0.087
TSHI	1	2	-0.012	0.07	0.87	-0.15	0.127	-0.11	0.064	0.087	-0.236	0.016
		3	-0.19	0.12	0.112	-0.425	0.044	-0.159	0.091	0.081	-0.338	0.02
	2	3	-0.179	0.122	0.143	-0.418	0.061	-0.049	0.095	0.608	-0.235	0.138
TT4RI	1	2	0.571	2.109	0.786	-3.568	4.711	-2.097	1.446	0.148	-4.938	0.744
		3	-2.766	3.584	0.44	-9.801	4.27	-4.126	2.048	0.044	-8.151	-0.102
	2	3	-3.337	3.656	0.362	-10.515	3.84	-2.029	2.138	0.343	-6.23	2.171
TT3RI	1	2	-0.898	0.388	0.021	-1.659	-0.136	-1.351	0.523	0.01	-2.379	-0.322
		3	-2.122	0.659	0.001	-3.416	-0.828	-1.655	0.742	0.026	-3.112	-0.198
	2	3	-1.224	0.672	0.069	-2.545	0.096	-0.304	0.774	0.694	-1.825	1.216
fT3/fT4	1	2	-0.026	0.007	< 0.001	-0.039	-0.012	-0.0136209	0.00796299	0.0878008	-0.0292666	0.00202486
		3	-0.016	0.012	0.181	-0.039	0.007	-0.0102668	0.0112813	0.363232	-0.0324325	0.0118989
	2	3	0.01	0.012	0.389	-0.013	0.034	0.00335408	0.011775	0.775881	-0.0197815	0.0264896
TSH (mIU/L)	1	2	-0.145	0.084	0.084	-0.309	0.02	-0.24429	0.115503	0.0349297	-0.471235	-0.0173524
		3	-0.328	0.142	0.021	-0.608	-0.049	-0.37448	0.163636	0.022531	-0.695996	-0.0529716
	2	3	-0.184	0.145	0.206	-0.469	0.101	-0.130191	0.170796	0.446271	-0.465771	0.20539
Triglycerides（mmol/L）	1	2	-0.342	0.09	< 0.001	-0.519	-0.165	0.279434	1.26196	0.824851	-2.20008	2.75895
		3	-0.565	0.153	< 0.001	-0.865	-0.264	0.66878	1.78785	0.708514	-2.844	4.18156
	2	3	-0.223	0.156	0.154	-0.529	0.084	0.389345	1.86608	0.834813	-3.27714	4.05583
High-density lipoprotein（mmol/L）	1	2	0.1	0.042	0.019	0.016	0.183	0.438288	0.477754	0.359387	-0.500406	1.37698
		3	0.123	0.072	0.087	-0.018	0.265	0.439549	0.676844	0.516377	-0.890319	1.76942
	2	3	0.024	0.073	0.746	-0.12	0.168	0.00126136	0.70646	0.998576	-1.3868	1.38932
ALT（U/L）	1	2	-2.02748	2.02453	0.316941	-6.00218	1.94721	-4.86643	4.29073	0.257276	-13.2969	3.56406
		3	-21.8159	3.4405	< 0.001	-28.5706	-15.0613	-11.7583	6.07629	0.0535515	-23.6971	0.180489
	2	3	-19.7885	3.50982	< 0.001	-26.6792	-12.8977	-6.89187	6.33959	0.27752	-19.348	5.56426
AST（U/L）	1	2	-1.31439	1.46796	0.370884	-4.1964	1.56763	-1.72381	2.85054	0.545636	-7.32457	3.87695
		3	-11.8962	2.49467	< 0.001	-16.7939	-6.9985	-5.47784	4.03842	0.175586	-13.4126	2.45688
	2	3	-10.5818	2.54494	< 0.001	-15.5783	-5.58543	-3.75402	4.21512	0.373576	-12.0359	4.52789
Upper limb fat ratio	1	2	-4.6411	0.457927	< 0.001	-5.5401	-3.74202	-5.7785	0.619685	< 0.001	-6.99602	-4.5609
		3	-10.9245	0.778206	< 0.001	-12.4523	-9.39664	-10.4963	0.877921	< 0.001	-12.2212	-8.77135
	2	3	-6.2834	0.793886	< 0.001	-7.84202	-4.72479	-4.7178	0.916335	< 0.001	-6.51825	-2.91741
Lower limb fat ratio	1	2	-3.416	0.431	< 0.001	-4.262	-2.57	-4.8535	0.618159	< 0.001	-6.06802	-3.63889
		3	-7.857	0.732	< 0.001	-9.295	-6.419	-9.4321	0.87576	< 0.001	-11.1528	-7.7114
	2	3	-4.441	0.747	< 0.001	-5.907	-2.974	-4.5786	0.914079	< 0.001	-6.37463	-2.78265
Trunk fat ratio	1	2	-7.722	0.588	< 0.001	-8.877	-6.567	-7.024	0.605893	< 0.001	-8.21447	-5.83355
		3	-14.032	1	< 0.001	-15.996	-12.069	-11.5485	0.858382	< 0.001	-13.235	-9.8619
	2	3	-6.31	1.02	< 0.001	-8.313	-4.307	-4.5244	0.895941	< 0.001	-6.28479	-2.76409
Android fat ratio	1	2	-6.994	0.635	< 0.001	-8.241	-5.746	-6.1701	0.652012	< 0.001	-7.45115	-4.88898
		3	-12.449	1.08	< 0.001	-14.569	-10.329	-9.6264	0.923343	< 0.001	-11.4406	-7.8122
	2	3	-5.455	1.102	< 0.001	-7.618	-3.293	-3.4563	0.963354	< 0.001	-5.34915	-1.56352
Gynoid fat ratio	1	2	-3.138	0.57	< 0.001	-4.257	-2.018	-2.63958	1.68963	0.11888	-5.95939	0.680226
		3	-7.129	0.969	< 0.001	-9.031	-5.226	-6.4453	2.39276	0.00730972	-11.1466	-1.74393
	2	3	-3.991	0.989	< 0.001	-5.932	-2.05	-3.80567	2.49644	0.128044	-8.71072	1.09938
Total fat ratio	1	2	-5.64	0.462	< 0.001	-6.546	-4.733	-5.9941	0.510005	< 0.001	-6.99618	-4.99204
		3	-11.177	0.785	< 0.001	-12.718	-9.637	-10.609	0.722241	< 0.001	-12.028	-9.18989
	2	3	-5.538	0.8	< 0.001	-7.109	-3.966	-4.6149	0.753537	< 0.001	-6.09541	-3.13429
ASMI	1	2	-0.762	0.066	< 0.001	-0.892	-0.632	-0.630604	0.0803388	< 0.001	-0.788455	-0.472754
		3	-1.579	0.112	< 0.001	-1.799	-1.358	-1.11512	0.113818	< 0.001	-1.33875	-0.891486
	2	3	-0.817	0.115	< 0.001	-1.042	-0.592	-0.484511	0.118798	< 0.001	-0.717926	-0.251096
SMI	1	2	-1.553	0.221	< 0.001	-1.987	-1.119	-1.1189	0.111632	< 0.001	-1.33823	-0.89956
		3	-2.766	0.376	< 0.001	-3.504	-2.028	-2.38204	0.158152	< 0.001	-2.69278	-2.0713
	2	3	-1.213	0.383	0.002	-1.966	-0.46	-1.26314	0.165072	< 0.001	-1.58748	-0.938809
Android fat/Android muscle	1	2	-0.157093	0.0141124	< 0.001	-0.1848	-0.129387	-0.195614	0.0186899	< 0.001	-0.232336	-0.158892
		3	-0.308627	0.0239827	< 0.001	-0.355711	-0.261542	-0.317197	0.0264676	< 0.001	-0.369201	-0.265193
	2	3	-0.151533	0.0244659	< 0.001	-0.199567	-0.1035	-0.121583	0.0276145	< 0.001	-0.175841	-0.0673259
Android fat / Gynoid fat	1	2	-0.115407	0.0153951	< 0.001	-0.145631	-0.0851819	-0.0531021	0.0237844	0.0260235	-0.099834	-0.00637007
		3	-0.155374	0.0261626	< 0.001	-0.206738	-0.104009	-0.133885	0.0336821	< 0.001	-0.200065	-0.0677061
	2	3	-0.0399671	0.0266898	0.134711	-0.0923664	0.0124322	-0.0807833	0.0351417	0.0219368	-0.14983	-0.0117364
Android muscle/Gynoid muscle	1	2	-0.00586308	0.0049647	0.238013	-0.0156101	0.00388399	-9.4637e-05	0.0162547	0.995357	-0.0320322	0.031843
		3	-0.0168882	0.00843707	0.0456969	-0.0334524	-0.000323888	-0.0811782	0.0230191	< 0.001	-0.126406	-0.0359499
	2	3	-0.0110251	0.00860707	0.200631	-0.0279231	0.00587296	-0.0810835	0.0240165	0.000793491	-0.128272	-0.0338954
1: normal group; 2:overweight group; 3:obesity group
